# Supplementary material for: Linking climate change to self-harm: A global study of over 200 countries from 1990 to 2020
Source: Research Square preprint supplement (doi:10.21203/rs.3.rs-8008087/v1), 2025-11-17
Supplement: Supplementary file [file 2552c7c994ce124ac9210e2a.pdf]

## Supplementary Tables

Table S2-7 are GAM estimates and statistical outputs. The model estimates and related standard errors (Std.Error) were shown for parametric terms. For non-parametric smooth terms, their estimated and reference degrees of freedom (i.e. edf, sumEDF, Ref.df) and their test statistics were shown.

**Table S1.**  $R^2$  for correlations among global data.

|                  | <b>Self-harm</b> | <b>GDP</b> | <b>PM2.5</b> | <b>Temp</b> | <b>GHG</b> |
|------------------|------------------|------------|--------------|-------------|------------|
| <b>Self-harm</b> | 1.00             | 0.95       | 0.03         | 0.74        | 0.77       |
| <b>GDP</b>       | -                | 1.00       | 0.04         | 0.64        | 0.80       |
| <b>PM2.5</b>     | -                | -          | 1.00         | 0.06        | 0.00       |
| <b>Temp</b>      | -                | -          | -            | 1.00        | 0.50       |
| <b>GHG</b>       | -                | -          | -            | -           | 1.00       |

**Self-harm:** Self-harm age-standardized incidence rate for both sexes (new cases per 100000)

**GDP:** GDP per capita (current US\$)

**PM2.5:** PM2.5 air pollution, mean annual exposure ( $\mu\text{g}/\text{m}^3$ )

**Temp:** Temperature change relative to baseline climatology ( $^{\circ}\text{C}$ )

**GHG:** Total greenhouse gas (GHG) emissions per capita (Mt CO<sub>2</sub>eq)

**Table S2.** Relative fit of GAM analyzing the predictors for log10-transformed self-harm incidence rate globally (total greenhouse gas emission per capita). AIC = Akaike information criterion. sumEDF indicates the degrees of freedom of the models. Model 16 was selected as the best model because of the lowest AIC. (related to Figure 1g)

| GAM | AIC       | sumEDF | Formula                                                                                                                                                                                                            |
|-----|-----------|--------|--------------------------------------------------------------------------------------------------------------------------------------------------------------------------------------------------------------------|
| 0   | -14557.42 | 174.84 | gam(log10-transformed self-harm incidence rate ~ 1 + s(Country, bs = "re"))                                                                                                                                        |
| 1   | -15105.04 | 178.34 | gam(log10-transformed self-harm incidence rate ~ s(Country, bs = "re") + s(GDP))                                                                                                                                   |
| 2   | -14956.91 | 178.86 | gam(log10-transformed self-harm incidence rate ~ s(Country, bs = "re") + s(Year))                                                                                                                                  |
| 3   | -15231.06 | 186.49 | gam(log10-transformed self-harm incidence rate ~ s(Year) + s(GDP) + s(Country, bs = "re"))                                                                                                                         |
| 4   | -15346.1  | 193.38 | gam(log10-transformed self-harm incidence rate ~ te(Year, GDP) + s(Country, bs = "re"))                                                                                                                            |
| 5   | -14585.07 | 182.36 | gam(log10-transformed self-harm incidence rate ~ s(GHG.EMISSION) + s(Country, bs = "re"))                                                                                                                          |
| 6   | -14978.65 | 185.00 | gam(log10-transformed self-harm incidence rate ~ s(GHG.EMISSION) + s(Year) + s(Country, bs = "re"))                                                                                                                |
| 7   | -15177.24 | 187.94 | gam(log10-transformed self-harm incidence rate ~ s(GHG.EMISSION) + s(GDP) + s(Country, bs = "re"))                                                                                                                 |
| 8   | -15242.28 | 191.88 | gam(log10-transformed self-harm incidence rate ~ s(GHG.EMISSION) + s(Year) + s(GDP) + s(Country, bs = "re"))                                                                                                       |
| 9   | -15344.25 | 195.32 | gam(log10-transformed self-harm incidence rate ~ s(GHG.EMISSION) + te(Year, GDP) + s(Country, bs = "re"))                                                                                                          |
| 10  | -15386.89 | 199.00 | gam(log10-transformed self-harm incidence rate ~ te(GHG.EMISSION, GDP) + s(Year) + s(Country, bs = "re"))                                                                                                          |
| 11  | -15318.88 | 202.30 | gam(log10-transformed self-harm incidence rate ~ te(GHG.EMISSION, Year) + s(GDP) + s(Country, bs = "re"))                                                                                                          |
| 12  | -15653.43 | 252.42 | gam(log10-transformed self-harm incidence rate ~ te(GHG.EMISSION, Year, GDP) + s(Country, bs = "re"))                                                                                                              |
| 13  | -15065.14 | 192.29 | gam(log10-transformed self-harm incidence rate ~ te(GHG.EMISSION, Year) + s(Country, bs = "re"))                                                                                                                   |
| 14  | -15321.84 | 194.97 | gam(log10-transformed self-harm incidence rate ~ te(GHG.EMISSION, GDP) + s(Country, bs = "re"))                                                                                                                    |
| 15  | -15374.84 | 212.91 | gam(log10-transformed self-harm incidence rate ~ s(GHG.EMISSION) + s(Year) + s(GDP) + ti(GHG.EMISSION, Year, GDP) + s(Country, bs = "re"), data = complete                                                         |
| 16  | -15708.42 | 233.82 | <b>gam(log10-transformed self-harm incidence rate ~ s(GHG.EMISSION) + s(Year) + s(GDP) + ti(GHG.EMISSION, Year, GDP) + ti(GHG.EMISSION, Year) + ti(GHG.EMISSION, GDP) + ti(GDP, Year) + s(Country, bs = "re"))</b> |
| 17  | -15515.49 | 215.45 | gam(log10-transformed self-harm incidence rate ~ s(GHG.EMISSION) + s(Year) + s(GDP) + ti(GHG.EMISSION, Year) + ti(GHG.EMISSION, GDP) + ti(GDP, Year) + s(Country, bs = "re"))                                      |

|    |           |        |                                                                                                                                                                                             |
|----|-----------|--------|---------------------------------------------------------------------------------------------------------------------------------------------------------------------------------------------|
| 18 | -15639.20 | 219.15 | gam(log10-transformed self-harm incidence rate ~ s(GHG.EMISSION) + s(Year) + s(GDP) + ti(GHG.EMISSION, Year, GDP) + ti(GHG.EMISSION, GDP) + ti(GDP, Year) + s(Country, bs = "re"))          |
| 19 | -15646.26 | 217.28 | gam(log10-transformed self-harm incidence rate ~ s(GHG.EMISSION) + s(Year) + s(GDP) + ti(GHG.EMISSION, Year, GDP) + ti(GHG.EMISSION, Year) + ti(GDP, Year) + s(Country, bs = "re"))         |
| 20 | -15634.85 | 221.01 | gam(log10-transformed self-harm incidence rate ~ s(GHG.EMISSION) + s(Year) + s(GDP) + ti(GHG.EMISSION, Year, GDP) + ti(GHG.EMISSION, Year) + ti(GHG.EMISSION, GDP) + s(Country, bs = "re")) |

**Table S3.** Estimated effects of total greenhouse gas (GHG) emission per capita, GDP per capita and year on log10-transformed self-harm incidence rate globally. (related to Figure 1g)

| Parametric coefficients                           |          |           |          |          |
|---------------------------------------------------|----------|-----------|----------|----------|
|                                                   | Estimate | Std.Error | t value  | Pr(> t ) |
| (Intercept)                                       | 1.646419 | 0.002329  | 707.1    | <2e-16   |
| Approximate significance of smooth terms          |          |           |          |          |
|                                                   | edf      | Ref.df    | F        | P value  |
| s(GHG.EMISSION)                                   | 6.743    | 7.941     | 1.756    | 0.0988   |
| s(Year)                                           | 4.866    | 5.956     | 16.199   | <2e-16   |
| s(GDP)                                            | 8.005    | 8.742     | 9.376    | <2e-16   |
| ti(GHG.EMISSION, Year, GDP)                       | 17.527   | 19.358    | 11.234   | <2e-16   |
| ti(GHG.EMISSION, Year)                            | 4.000    | 4.000     | 14.776   | <2e-16   |
| ti(GHG.EMISSION, GDP)                             | 8.865    | 9.670     | 6.051    | <2e-16   |
| ti(Year, GDP)                                     | 8.817    | 10.280    | 7.600    | <2e-16   |
| s(Country)                                        | 174.006  | 175.000   | 1605.212 | <2e-16   |
| R-sq.(adj) = 0.992 Deviance explained = 99.2%     |          |           |          |          |
| GCV = 0.00080387 scale est. = 0.00075251 n = 3660 |          |           |          |          |

**Table S4.** Relative fit of GAM analyzing the predictors for log10-transformed self-harm incidence rate globally (temperature change relative to baseline climatology). AIC = Akaike information criterion. sumEDF indicates the degrees of freedom of the models. Model 16 was selected as the best model because of the lowest AIC. (related to Figure 1h)

| GAM | AIC              | sumEDF        | Formula                                                                                                                                                                                                    |
|-----|------------------|---------------|------------------------------------------------------------------------------------------------------------------------------------------------------------------------------------------------------------|
| 0   | -19582.21        | 195.77        | gam(log10-transformed self-harm incidence rate ~ 1 + s(Country, bs = "re"))                                                                                                                                |
| 1   | -20294.13        | 204.61        | gam(log10-transformed self-harm incidence rate ~ s(Country, bs = "re") + s(GDP))                                                                                                                           |
| 2   | -19935.22        | 201.68        | gam(log10-transformed self-harm incidence rate ~ s(Country, bs = "re") + s(Year))                                                                                                                          |
| 3   | -20357.67        | 211.64        | gam(log10-transformed self-harm incidence rate ~ s(Year) + s(GDP) + s(Country, bs = "re"))                                                                                                                 |
| 4   | -20518.72        | 218.18        | gam(log10-transformed self-harm incidence rate ~ te(Year, GDP) + s(Country, bs = "re"))                                                                                                                    |
| 5   | -19703.61        | 201.53        | gam(log10-transformed self-harm incidence rate ~ s(TEMPCHANGE) + s(Country, bs = "re"))                                                                                                                    |
| 6   | -19978.92        | 207.08        | gam(log10-transformed self-harm incidence rate ~ s(TEMPCHANGE) + s(Year) + s(Country, bs = "re"))                                                                                                          |
| 7   | -20317.47        | 209.92        | gam(log10-transformed self-harm incidence rate ~ s(TEMPCHANGE) + s(GDP) + s(Country, bs = "re"))                                                                                                           |
| 8   | -20383.29        | 217.10        | gam(log10-transformed self-harm incidence rate ~ s(TEMPCHANGE) + s(Year) + s(GDP) + s(Country, bs = "re"))                                                                                                 |
| 9   | -20532.60        | 223.60        | gam(log10-transformed self-harm incidence rate ~ s(TEMPCHANGE) + te(Year, GDP) + s(Country, bs = "re"))                                                                                                    |
| 10  | -20456.89        | 222.62        | gam(log10-transformed self-harm incidence rate ~ te(TEMPCHANGE, GDP) + s(Year) + s(Country, bs = "re"))                                                                                                    |
| 11  | -20395.63        | 222.50        | gam(log10-transformed self-harm incidence rate ~ te(TEMPCHANGE, Year) + s(GDP) + s(Country, bs = "re"))                                                                                                    |
| 12  | -20697.49        | 269.46        | gam(log10-transformed self-harm incidence rate ~ te(TEMPCHANGE, Year, GDP) + s(Country, bs = "re"))                                                                                                        |
| 13  | -20019.53        | 214.24        | gam(log10-transformed self-harm incidence rate ~ te(TEMPCHANGE, Year) + s(Country, bs = "re"))                                                                                                             |
| 14  | -20391.18        | 215.51        | gam(log10-transformed self-harm incidence rate ~ te(TEMPCHANGE, GDP) + s(Country, bs = "re"))                                                                                                              |
| 15  | -20646.97        | 237.61        | gam(log10-transformed self-harm incidence rate ~ s(TEMPCHANGE) + s(Year) + s(GDP) + ti(TEMPCHANGE, Year, GDP) + s(Country, bs = "re"), data = complete                                                     |
| 16  | <b>-20764.19</b> | <b>249.59</b> | <b>gam(log10-transformed self-harm incidence rate ~ s(TEMPCHANGE) + s(Year) + s(GDP) + ti(TEMPCHANGE, Year, GDP) + ti(TEMPCHANGE, Year) + ti(TEMPCHANGE, GDP) + ti(GDP, Year) + s(Country, bs = "re"))</b> |
| 17  | -20686.44        | 243.74        | gam(log10-transformed self-harm incidence rate ~ s(TEMPCHANGE) + s(Year) + s(GDP) + ti(TEMPCHANGE, Year) + ti(TEMPCHANGE, GDP) + ti(GDP, Year) + s(Country, bs = "re"))                                    |

|    |           |        |                                                                                                                                                                                     |
|----|-----------|--------|-------------------------------------------------------------------------------------------------------------------------------------------------------------------------------------|
| 18 | -20763.32 | 248.13 | gam(log10-transformed self-harm incidence rate ~ s(TEMPCHANGE) + s(Year) + s(GDP) + ti(TEMPCHANGE, Year, GDP) + ti(TEMPCHANGE, GDP) + ti(GDP, Year) + s(Country, bs = "re"))        |
| 19 | -20759.4  | 240.51 | gam(log10-transformed self-harm incidence rate ~ s(TEMPCHANGE) + s(Year) + s(GDP) + ti(TEMPCHANGE, Year, GDP) + ti(TEMPCHANGE, Year) + ti(GDP, Year) + s(Country, bs = "re"))       |
| 20 | -20677.04 | 265.41 | gam(log10-transformed self-harm incidence rate ~ s(TEMPCHANGE) + s(Year) + s(GDP) + ti(TEMPCHANGE, Year, GDP) + ti(TEMPCHANGE, Year) + ti(TEMPCHANGE, GDP) + s(Country, bs = "re")) |

**Table S5.** Estimated effects of temperature change relative to baseline climatology, GDP per capita and year on log10-transformed self-harm incidence rate globally. (related to Figure 1h)

| Parametric coefficients                          |          |           |          |          |
|--------------------------------------------------|----------|-----------|----------|----------|
|                                                  | Estimate | Std.Error | t value  | Pr(> t ) |
| (Intercept)                                      | 1.667    | 0.543     | 3.071    | 0.00214  |
| Approximate significance of smooth terms         |          |           |          |          |
|                                                  | edf      | Ref.df    | F        | P value  |
| s(TEMPCHANGE)                                    | 1.635    | 2.092     | 2.880    | 0.0604   |
| s(Year)                                          | 6.696    | 7.825     | 7.183    | <2e-16   |
| s(GDP)                                           | 8.768    | 8.978     | 20.117   | <2e-16   |
| ti(TEMPCHANGE, Year, GDP)                        | 11.652   | 12.797    | 8.442    | <2e-16   |
| ti(TEMPCHANGE, Year)                             | 2.207    | 3.033     | 1.422    | 0.2323   |
| ti(TEMPCHANGE, GDP)                              | 9.338    | 10.412    | 1.694    | 0.0786   |
| ti(Year, GDP)                                    | 13.296   | 14.475    | 9.008    | <2e-16   |
| s(Country)                                       | 195.000  | 196.000   | 1269.356 | <2e-16   |
| R-sq.(adj) = 0.982 Deviance explained = 98.3%    |          |           |          |          |
| GCV = 0.0018607 scale est. = 0.00017836 n = 6018 |          |           |          |          |

**Table S6.** Relative fit of GAM analyzing the predictors for log10-transformed self-harm incidence rate globally (PM2.5 mean annual exposure). AIC = Akaike information criterion. sumEDF indicates the degrees of freedom of the models. Model 16 was selected as the best model because of the lowest AIC. (related to Figure 1i)

| GAM | AIC              | sumEDF        | Formula                                                                                                                                                                                |
|-----|------------------|---------------|----------------------------------------------------------------------------------------------------------------------------------------------------------------------------------------|
| 0   | -20135.66        | 198.80        | gam(log10-transformed self-harm incidence rate ~ 1 + s(Country, bs = "re"))                                                                                                            |
| 1   | -20815.68        | 207.67        | gam(log10-transformed self-harm incidence rate ~ s(Country, bs = "re") + s(GDP))                                                                                                       |
| 2   | -20507.09        | 203.71        | gam(log10-transformed self-harm incidence rate ~ s(Country, bs = "re") + s(Year))                                                                                                      |
| 3   | -20864.59        | 213.17        | gam(log10-transformed self-harm incidence rate ~ s(Year) + s(GDP) + s(Country, bs = "re"))                                                                                             |
| 4   | -21008.88        | 221.05        | gam(log10-transformed self-harm incidence rate ~ te(Year, GDP) + s(Country, bs = "re"))                                                                                                |
| 5   | -20448.10        | 200.61        | gam(log10-transformed self-harm incidence rate ~ s(PM2.5) + s(Country, bs = "re"))                                                                                                     |
| 6   | -20884.55        | 212.04        | gam(log10-transformed self-harm incidence rate ~ s(PM2.5) + s(Year) + s(Country, bs = "re"))                                                                                           |
| 7   | -20983.55        | 212.23        | gam(log10-transformed self-harm incidence rate ~ s(PM2.5) + s(GDP) + s(Country, bs = "re"))                                                                                            |
| 8   | -20985.65        | 216.42        | gam(log10-transformed self-harm incidence rate ~ s(PM2.5) + s(Year) + s(GDP) + s(Country, bs = "re"))                                                                                  |
| 9   | -21145.53        | 225.47        | gam(log10-transformed self-harm incidence rate ~ s(PM2.5) + te(Year, GDP) + s(Country, bs = "re"))                                                                                     |
| 10  | -21312.38        | 227.40        | gam(log10-transformed self-harm incidence rate ~ te(PM2.5, GDP) + s(Year) + s(Country, bs = "re"))                                                                                     |
| 11  | -21190.79        | 226.54        | gam(log10-transformed self-harm incidence rate ~ te(PM2.5, Year) + s(GDP) + s(Country, bs = "re"))                                                                                     |
| 12  | -21783.36        | 299.76        | gam(log10-transformed self-harm incidence rate ~ te(PM2.5, Year, GDP) + s(Country, bs = "re"))                                                                                         |
| 13  | -21087.55        | 218.81        | gam(log10-transformed self-harm incidence rate ~ te(PM2.5, Year) + s(Country, bs = "re"))                                                                                              |
| 14  | -21258.99        | 221.72        | gam(log10-transformed self-harm incidence rate ~ te(PM2.5, GDP) + s(Country, bs = "re"))                                                                                               |
| 15  | -21311.9         | 263.43        | gam(log10-transformed self-harm incidence rate ~ s(PM2.5) + s(Year) + s(GDP) + ti(PM2.5, Year, GDP) + s(Country, bs = "re"), data = complete                                           |
| 16  | <b>-21841.08</b> | <b>305.11</b> | <b>gam(log10-transformed self-harm incidence rate ~ s(PM2.5) + s(Year) + s(GDP) + ti(PM2.5, Year, GDP) + ti(PM2.5, Year) + ti(PM2.5, GDP) + ti(GDP, Year) + s(Country, bs = "re"))</b> |
| 17  | -21724.29        | 256.44        | gam(log10-transformed self-harm incidence rate ~ s(PM2.5) + s(Year) + s(GDP) + ti(PM2.5, Year) + ti(PM2.5, GDP) + ti(GDP, Year) + s(Country, bs = "re"))                               |

|    |           |        |                                                                                                                                                                 |
|----|-----------|--------|-----------------------------------------------------------------------------------------------------------------------------------------------------------------|
| 18 | -21743.06 | 298.52 | gam(log10-transformed self-harm incidence rate ~ s(PM2.5) + s(Year) + s(GDP) + ti(PM2.5, Year, GDP) + ti(PM2.5, GDP) + ti(GDP, Year) + s(Country, bs = "re"))   |
| 19 | -21515.79 | 276.52 | gam(log10-transformed self-harm incidence rate ~ s(PM2.5) + s(Year) + s(GDP) + ti(PM2.5, Year, GDP) + ti(PM2.5, Year) + ti(GDP, Year) + s(Country, bs = "re"))  |
| 20 | -21767.8  | 295.5  | gam(log10-transformed self-harm incidence rate ~ s(PM2.5) + s(Year) + s(GDP) + ti(PM2.5, Year, GDP) + ti(PM2.5, Year) + ti(PM2.5, GDP) + s(Country, bs = "re")) |

**Table S7.** Estimated effects of PM2.5 mean annual exposure, GDP per capita and year on log10-transformed self-harm incidence rate globally. (related to Figure 1i)

| Parametric coefficients                         |          |           |          |          |
|-------------------------------------------------|----------|-----------|----------|----------|
|                                                 | Estimate | Std.Error | t value  | Pr(> t ) |
| (Intercept)                                     | 1.6778   | 0.1836    | 9.137    | <2e-16   |
| Approximate significance of smooth terms        |          |           |          |          |
|                                                 | edf      | Ref.df    | F        | P value  |
| s(PM2.5)                                        | 7.750    | 8.622     | 7.204    | <2e-16   |
| s(Year)                                         | 5.554    | 6.801     | 6.654    | <2e-16   |
| s(GDP)                                          | 8.665    | 8.958     | 17.696   | <2e-16   |
| ti(PM2.5, Year, GDP)                            | 49.798   | 53.180    | 3.582    | <2e-16   |
| ti(PM2.5, Year)                                 | 9.888    | 11.156    | 12.977   | <2e-16   |
| ti(PM2.5, GDP)                                  | 15.222   | 15.570    | 22.144   | <2e-16   |
| ti(Year, GDP)                                   | 9.234    | 10.772    | 8.207    | <2e-16   |
| s(Country)                                      | 197.997  | 199.000   | 1452.595 | <2e-16   |
| R-sq.(adj) = 0.985 Deviance explained = 98.6%   |          |           |          |          |
| GCV = 0.0015723 scale est. = 0.0014928 n = 6034 |          |           |          |          |
